# Supplementary material for: An Improved Synthesis of Pentacene: Rapid Access to a Benchmark Organic Semiconductor
Source: Molecules. 2012 Apr 20;17(4):4625–33. doi: 10.3390/molecules17044625 (PMC6268729; doi:10.3390/molecules17044625)

# Supporting Information

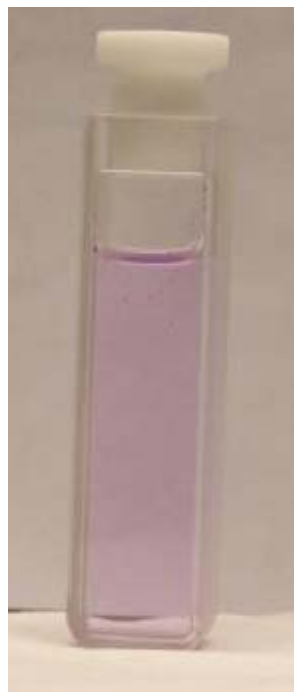

## **An Improved Synthesis of Pentacene: Rapid Access to a Benchmark Organic Semiconductor**

**Chandrani Pramanik and Glen P. Miller\***

Department of Chemistry & Materials Science Program, University of  
New Hampshire Durham, NH 03824 -3598 , USA;  
E-Mail: [glen.miller@unh.edu](mailto:glen.miller@unh.edu) (G.P.M)

# MALDI MS of pentacene as prepared using S<sub>8</sub> as matrix

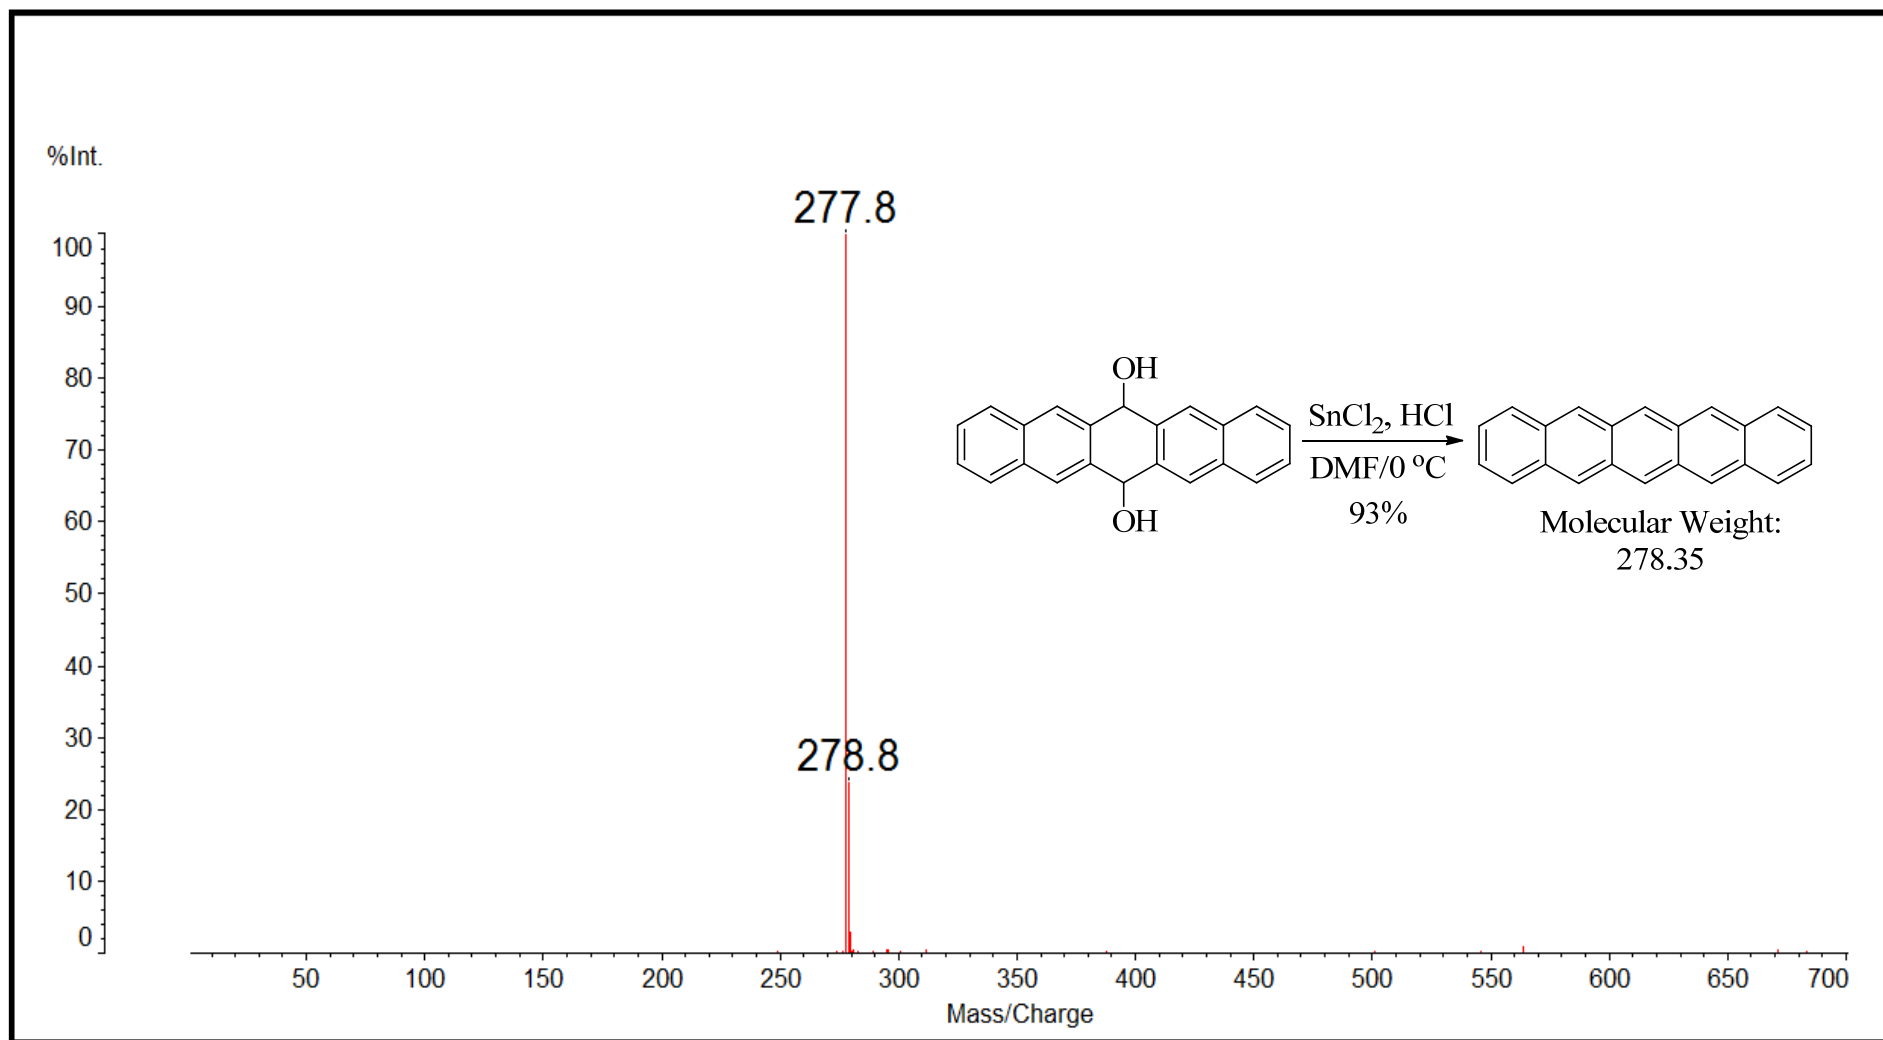

# LDI MS of pentacene as prepared

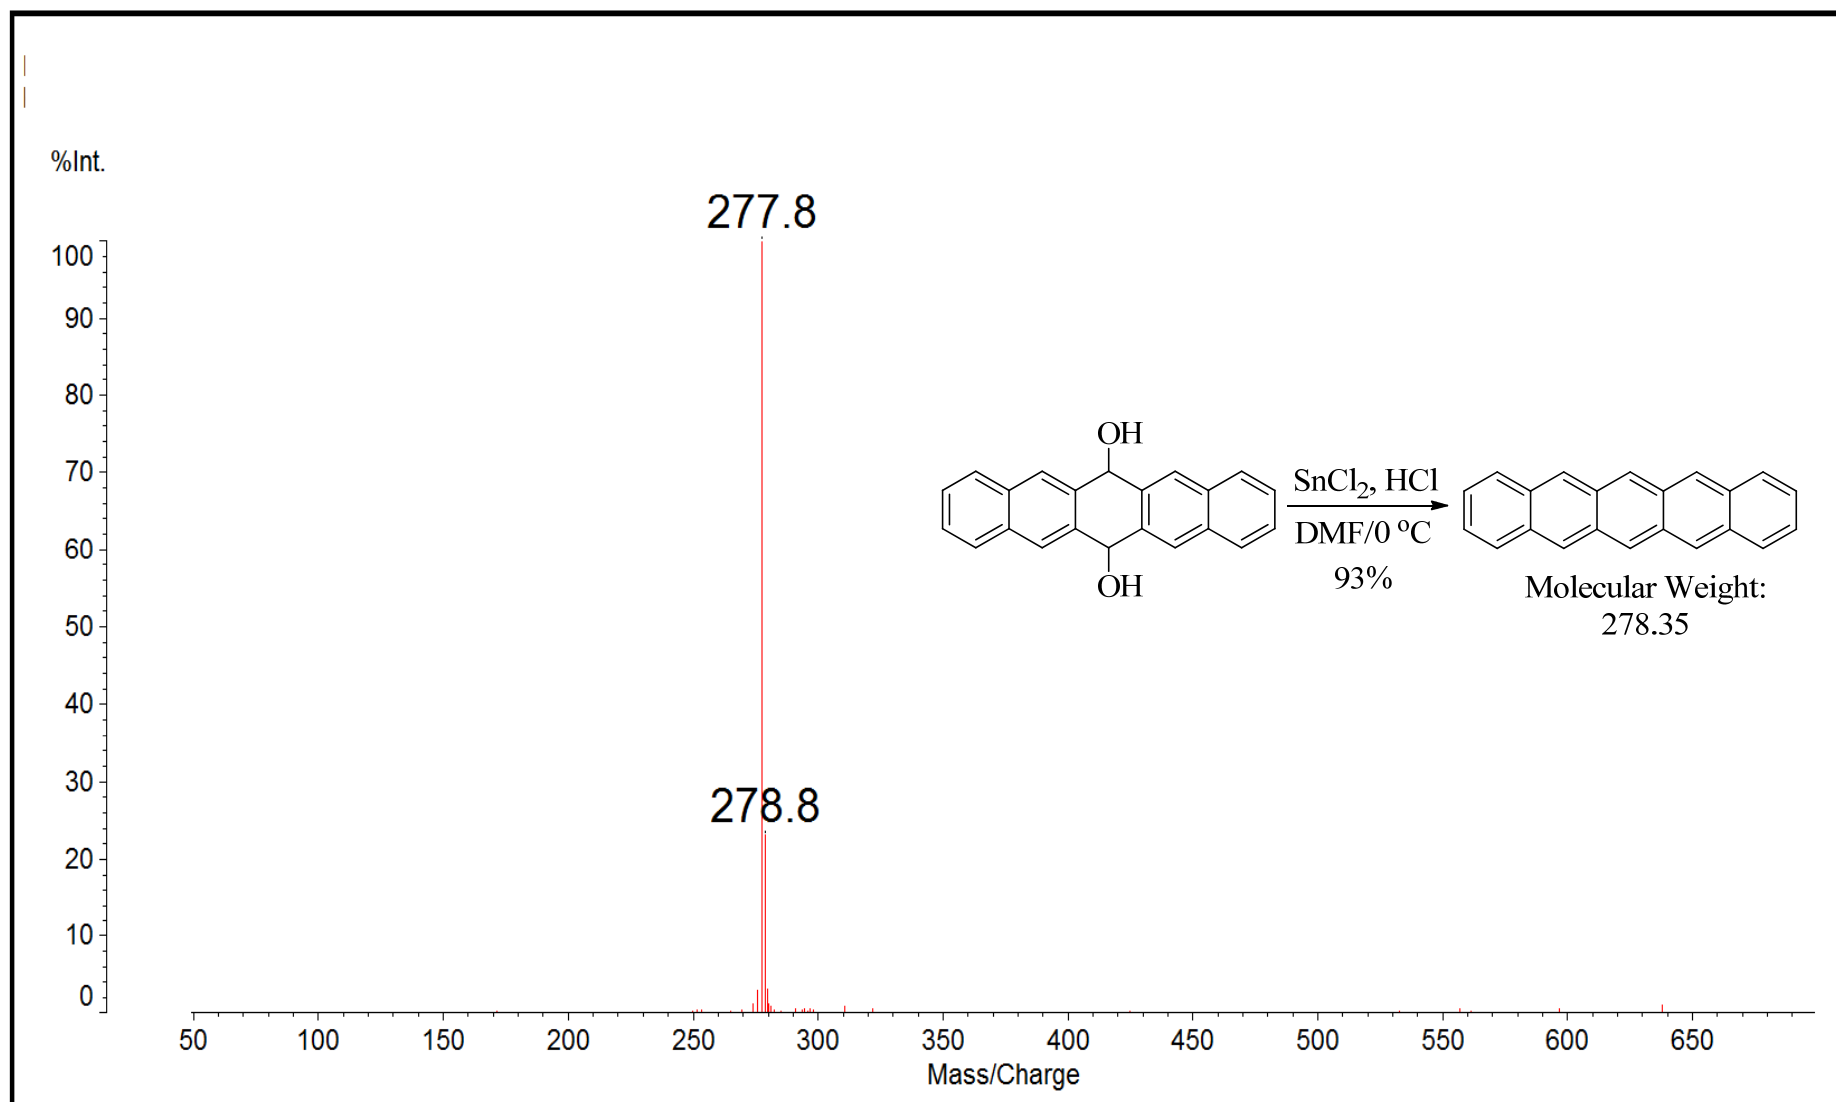

# UV-vis spectrum of pentacene as prepared in ODCB

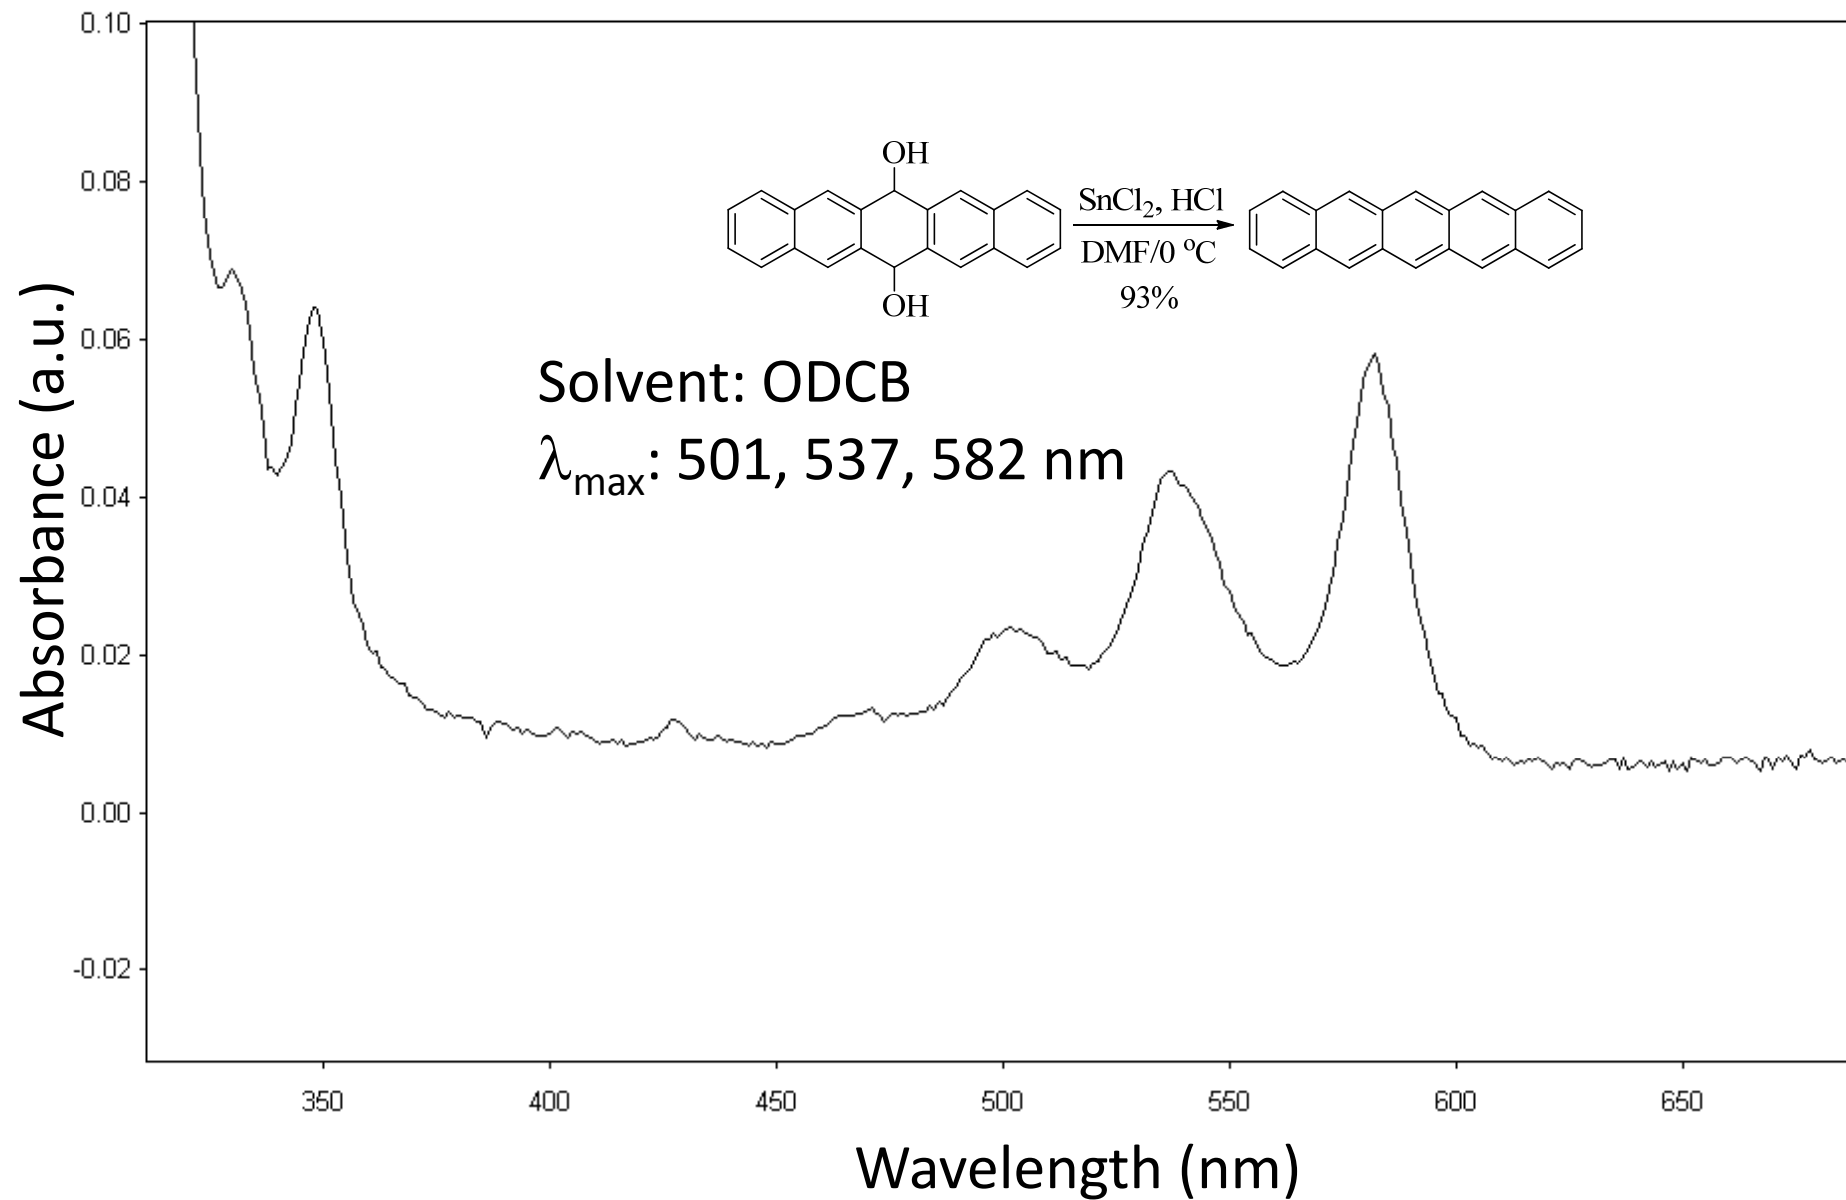

UV-vis spectrum of pentacene as prepared (black) *vs.* commercial pentacene purified by sublimation (red)

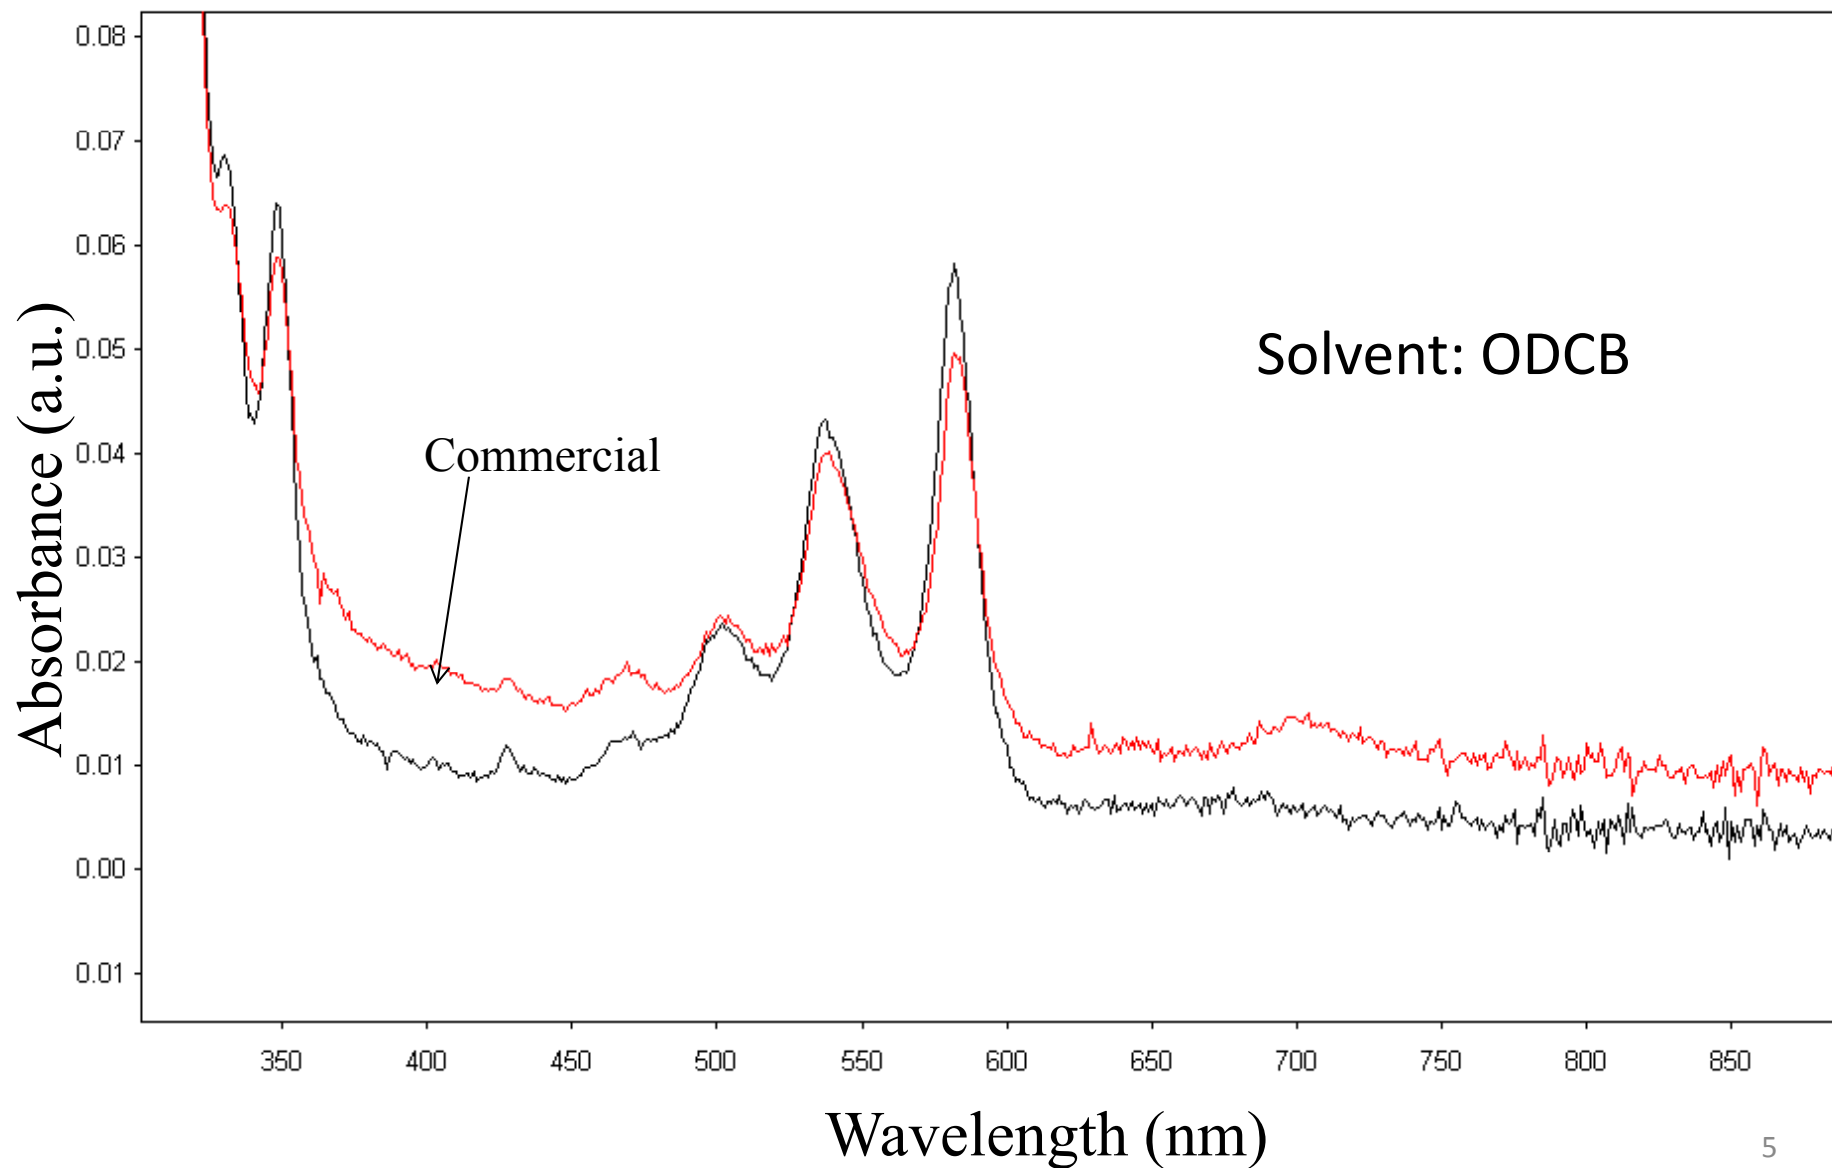

# UV-vis spectrum of pentacene as prepared in $\text{CHCl}_3$

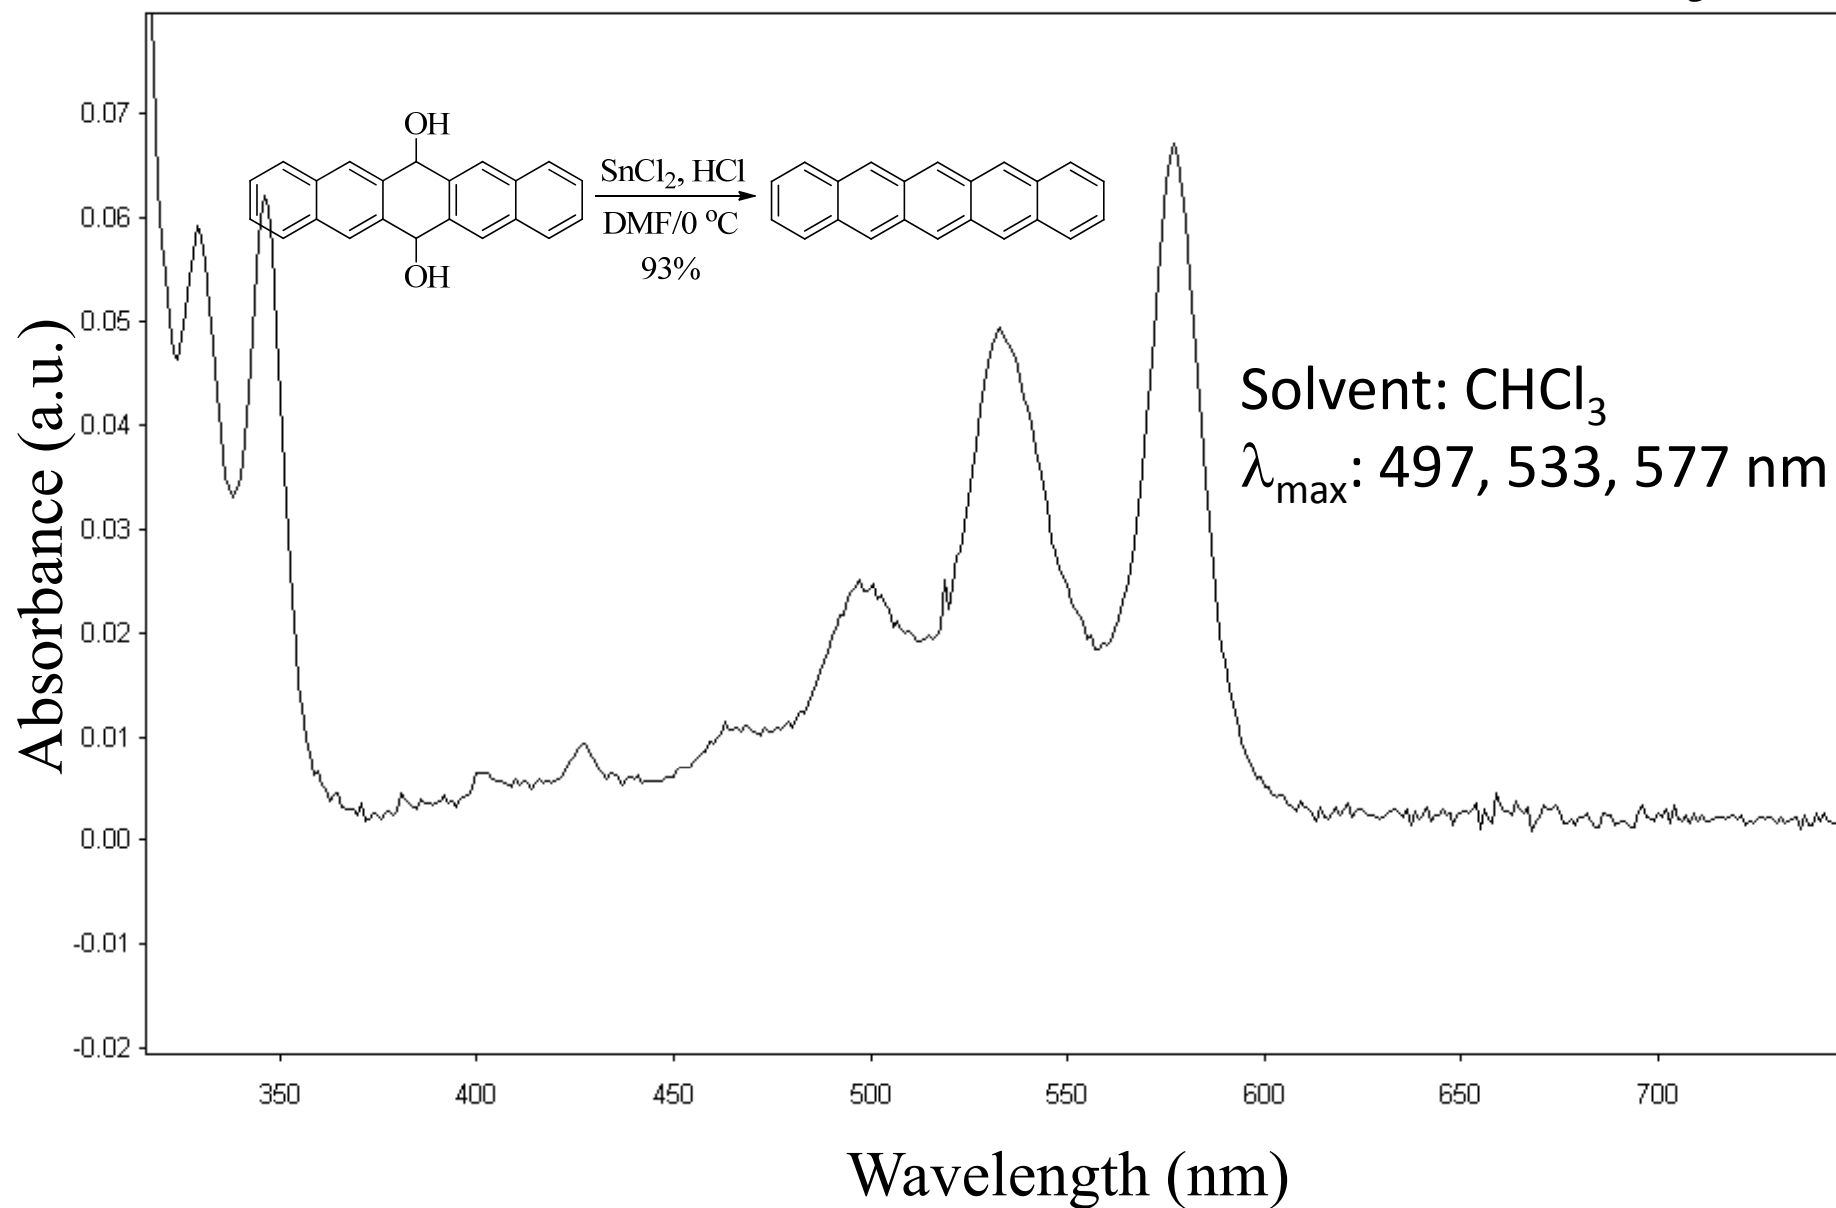

UV-vis spectrum of pentacene as prepared (black) *vs.* commercial pentacene purified by sublimation (red)

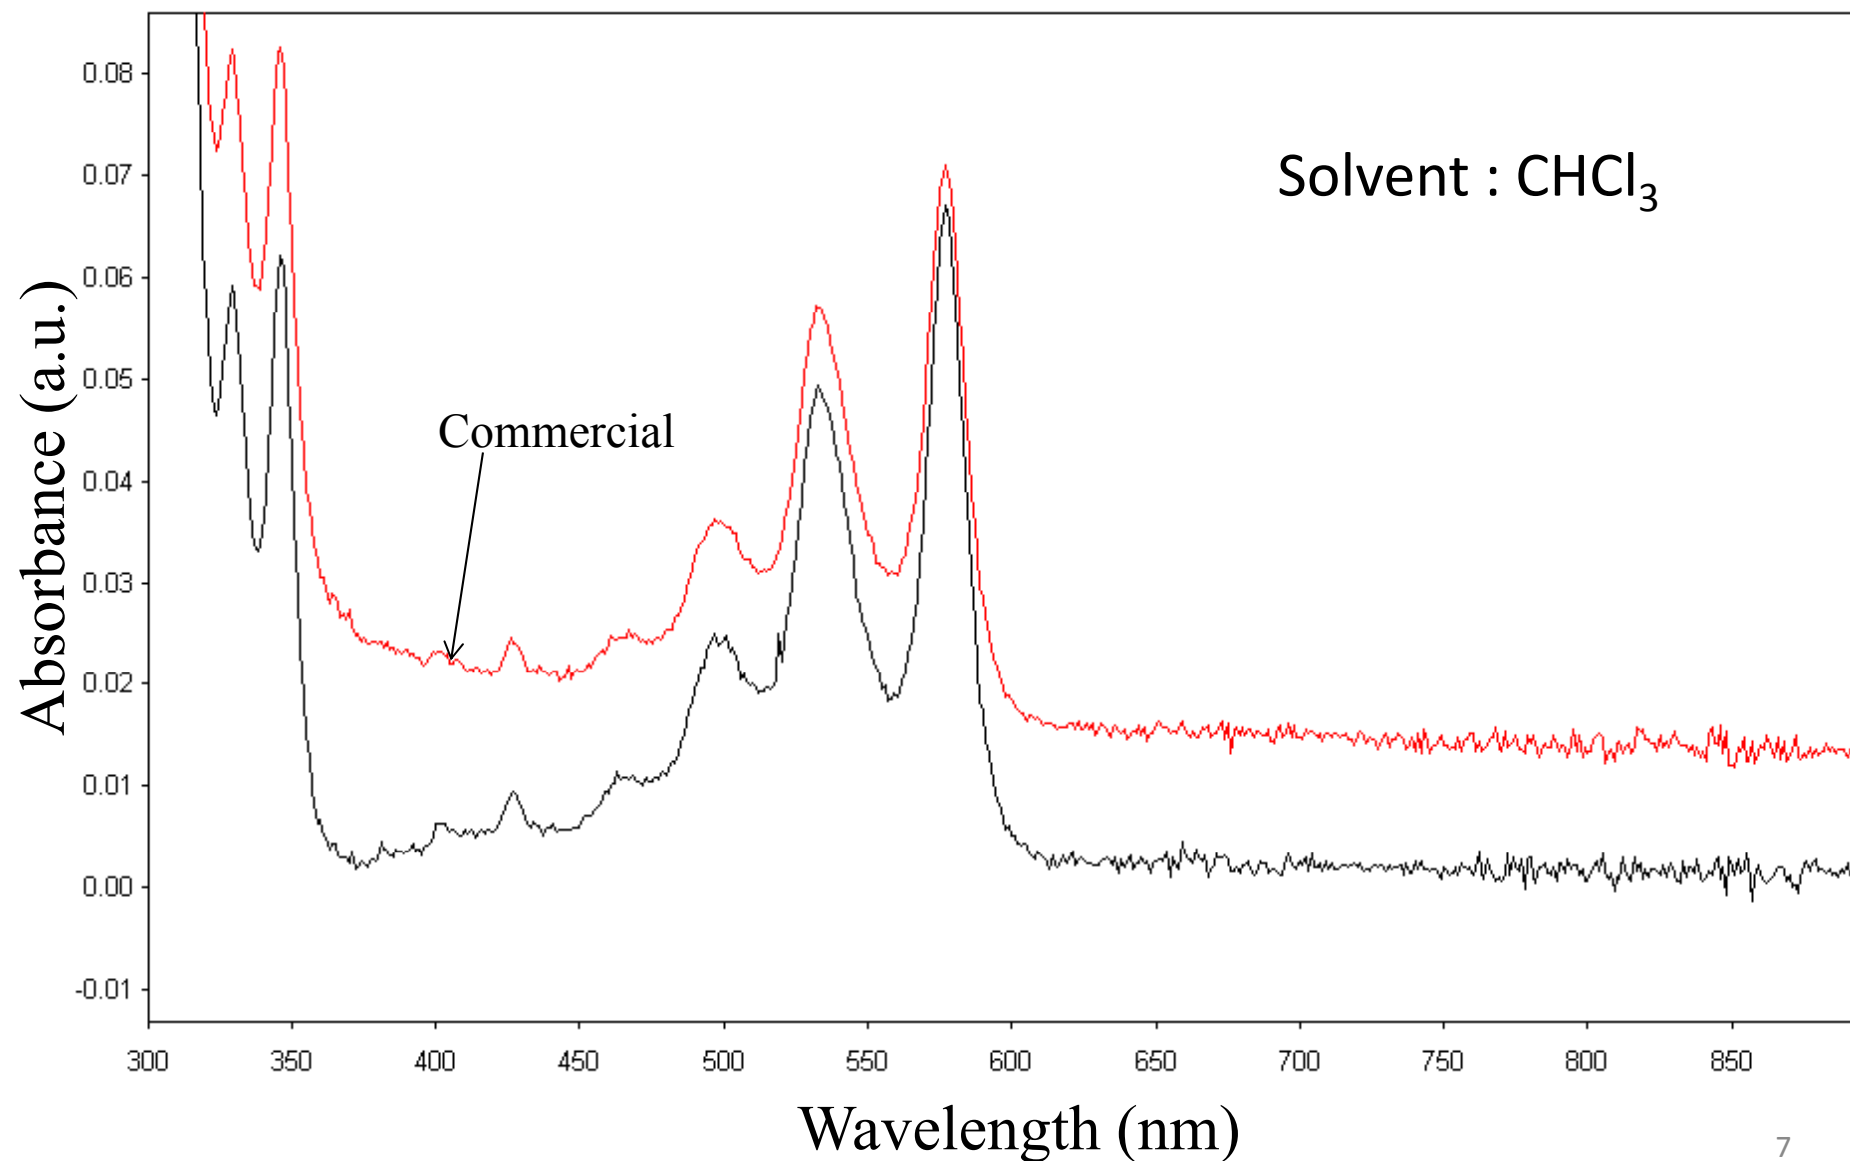

Supplement: Supplementary file 1 [file molecules-17-04625-s001.pdf]
